# Supplementary material for: A Qualitative Study of the Impact of COVID-19 on Smoking Behavior for Participants in a Post-Hospitalization Smoking Cessation Trial
Source: Int J Environ Res Public Health. 2021 May 19;18(10):5404. doi: 10.3390/ijerph18105404 (PMC8158767; doi:10.3390/ijerph18105404)
Supplement: Supplementary file 1 [file ijerph-18-05404-s001.zip › ijerph-1183229-supplementary.pdf]

**Supplemental Table S1.** Baseline sample characteristics (n=39).

|                                                 | N (%)        |
|-------------------------------------------------|--------------|
| Age (mean [SD])                                 | 52.6 [12.7]  |
| Gender (female)                                 | 22 (56.4%)   |
| Race/ethnicity                                  |              |
| White, non-Hispanic                             | 32 (82.1%)   |
| Black or African American, non-Hispanic         | 3 (7.7%)     |
| Hispanic                                        | 4 (10.3%)    |
| Cigarettes/day (mean [SD])                      | 19.7 [13.1]  |
| Live with another smoker                        | 21 (53.9%)   |
| Home smoking policy                             |              |
| No smoking allowed at home                      | 20 (51.3%)   |
| Smoking allowed in some places at home          | 2 (5.1%)     |
| Smoking allowed anywhere at home                | 17 (43.6%)   |
| Importance of quitting <sup>1</sup>             | 9.36 [1.06]  |
| Confidence in ability to stay quit <sup>2</sup> | 6.85 [2.48]  |
| Depression symptoms (PHQ)                       |              |
| Mean [SD] <sup>3</sup>                          | 10.8 [7.4]   |
| PHQ $\geq 10^5$                                 | 21 (53.8%)   |
| Anxiety symptoms (GAD)                          |              |
| Mean [SD] <sup>4</sup>                          | 10.8 [7.5]   |
| GAD $\geq 10^6$                                 | 19 (48.7%)   |
| Resilience (BRS-mean [SD] <sup>7</sup> )        | 3.48 [1.00]  |
| Life orientation (LOTR-mean [SD] <sup>8</sup> ) | 13.42 [4.37] |

<sup>1</sup> Participant self-report of importance of quitting smoking when leaving the hospital from 1 (not at all important) to 10 (very important), assessed at baseline in hospital

<sup>2</sup> Participant self-report of confidence from 1 (not at all confident) to 10 (very confident) of in ability to stay quit for six months post-hospitalization, assessed at baseline in hospital

<sup>3</sup> Measured via Patient Health Questionnaire (PHQ-8) scale, assessed at baseline in hospital

<sup>4</sup> Measured via Generalized Anxiety Disorder (GAD-7) scale, assessed at baseline in hospital

<sup>5</sup> Indicative of moderate-severe depressive symptoms

<sup>6</sup> Indicative of moderate-severe anxiety symptoms

<sup>7</sup> Measured via Brief Resilience Scale (BRS), assessed at baseline in hospital

<sup>8</sup> Measured via Life Orientation Test-Revised (LOT-R), assessed at baseline in hospital
